# Supplementary material for: Determination of the Prevalence of Helicobacter heilmannii-Like Organisms Type 2 (HHLO-2) Infection in Humans and Dogs Using Non-Invasive Genus/Species-Specific PCR in Korea
Source: PubMed Central journal article supplement — J Vet Med Sci. 2013 Sep 20;76(1):73–9. doi: 10.1292/jvms.13-0223 (PMC3979946; doi:10.1292/jvms.13-0223), 2013-09-20
Supplement: jvms-76-073-s001.pdf [file jvms-76-073-s001.pdf]

## For dog-contact risk factor (for Table 1)

Total human subject: 124

**Dog-contact positive: 84**

**Vs Dog-contact negative: 40**

Dog owner: 41

veterinarian: 43

## For veterinarian risk factor (for Table 2)

Total dog-contact subject: 84

**Veterinarian positive: 43**

**Vs Veterinarian negative: 41**
