# Supplementary material for: Determination of the Prevalence of Helicobacter heilmannii-Like Organisms Type 2 (HHLO-2) Infection in Humans and Dogs Using Non-Invasive Genus/Species-Specific PCR in Korea
Source: PubMed Central journal article supplement — J Vet Med Sci. 2013 Sep 20;76(1):73–9. doi: 10.1292/jvms.13-0223 (PMC3979946; doi:10.1292/jvms.13-0223), 2013-09-20
Supplement: jvms-76-073-s002.pdf [file jvms-76-073-s002.pdf]

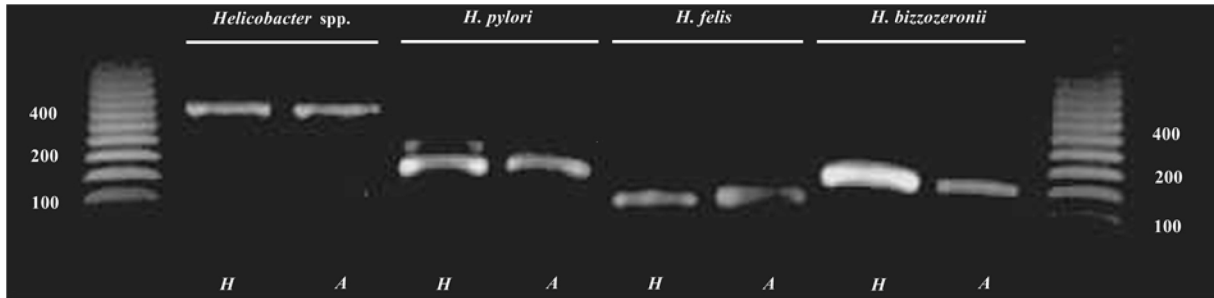

Supplemental Fig. 2. Detection of *Helicobacter* spp. DNA by genus-specific and species-specific nested PCR with specific primer (representative): Lanes 1 and 2 *Helicobacter* spp. genus positive samples (*H. spp.*) in human subject (*H*) and animal subject (*A*) (400 bp), lanes 3 and 4 *H. pylori* positive samples in human subject (*H*) and animal subject (*A*) (230 bp), lanes 5 and 6 *H. felis* positive samples in human subject (*H*) and animal subject (*A*) (160 bp), lanes 7 and 8 *H. bizzozeronii* positive samples in human subject (*H*) and animal subject (*A*) (207 bp) and each side marker (M); 50 bp DNA ladder.
