# Supplementary material for: Determination of the Prevalence of Helicobacter heilmannii-Like Organisms Type 2 (HHLO-2) Infection in Humans and Dogs Using Non-Invasive Genus/Species-Specific PCR in Korea
Source: PubMed Central journal article supplement — J Vet Med Sci. 2013 Sep 20;76(1):73–9. doi: 10.1292/jvms.13-0223 (PMC3979946; doi:10.1292/jvms.13-0223), 2013-09-20
Supplement: jvms-76-073-s003.pdf [file jvms-76-073-s003.pdf]

Supplemental Table 1. Primer sequences used for *Helicobacter* spp. polymerase chain reaction

| Target Gene            | Species                  | Oligonucleotides of PCR primer                                                                        | Products (bp) | Reference Article No. |
|------------------------|--------------------------|-------------------------------------------------------------------------------------------------------|---------------|-----------------------|
| 16S rRNA               | <i>Helicobacter</i> spp. | Outer primer<br>F: 5'-AGA GTT TGA TYM TGG C-3'<br>R: 5'-TAC GGY TAC CTT GTT ACG A-3'                  | 1,506         | [15]                  |
|                        |                          | Inner primer<br>F: 5'-GCT ATG ACG GGT ATC C-3'<br>R: 5'-GAT TTT ACC CCT ACA CCA-3'                    | 400           |                       |
| Urease B               | <i>H. pylori</i>         | Outer primer<br>F: 5'-CCC TCA CGC CAT CAG TCC CAA AAA-3'<br>R: 5'-AAG AAG TCA AAA ACG CCC CAA AAC-3'  | 417           | [15]                  |
|                        |                          | Inner primer<br>F: 5'-GGC AAA TCA TAA GTC CGC AGA A-3'<br>R: 5'-TGA GAC TTT CCT AGA AGC GGT GTT-3'    | 230           |                       |
|                        | <i>H. felis</i>          | Outer primer<br>F: 5'-ATG AAA CTA ACG CCT AAA GAA CTA G-3'<br>R: 5'-GGA GAG ATA AAG TGA ATA TGC GT-3' | 1,150         | [12]                  |
|                        |                          | Inner primer<br>F: 5'-TGT TAG ACT CGG CGA CAC TG-3'<br>R: 5'-GGC GTT AGT GAG CAC ACC AT-3'            | 160           |                       |
| <i>H. bizzozeronii</i> |                          | Outer primer<br>F: 5'-GAA GTC GAA CAT GAC TGC AC-3'<br>R: 5'-GGT CGC ATT AGT CCC ATC AG-3'            | 420           | [12]                  |
|                        |                          | Inner primer<br>F: 5'-GGG ATG GCA CAA ACC AAT AG-3'<br>R: 5'-AGC CAA AGC CTC AGT AGC AG-3'            | 207           |                       |

F: forward, R: reverse
